# Supplementary material for: Invasive Surgery Impairs the Regulatory Function of Human CD56bright Natural Killer Cells in Response to Staphylococcus aureus. Suppression of Interferon-γ Synthesis
Source: PubMed Central journal article supplement (PMC4474941; doi:10.1371/journal.pone.0130155), 2015-06-19
Supplement: pone.0130155.s001.pdf [file pone.0130155.s001.pdf]

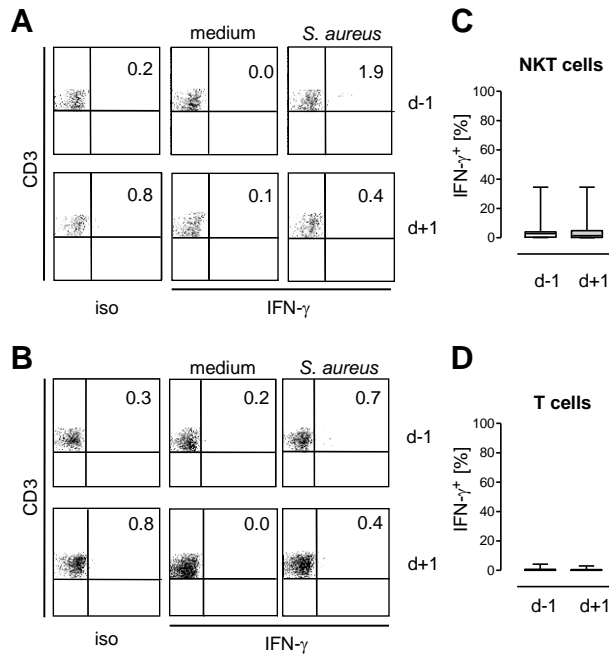

**S1 Figure. IFN- $\gamma$  expression in natural killer T cells and T cells upon exposure to *Staphylococcus aureus* after invasive surgery.** Peripheral blood from “patients 2” (n=20) was drawn 24 h before (d-1) and 1 d after injury (d+1). PBMC were isolated and cultured in the presence or absence of *S. aureus*. After addition of GolgiStop the cells were stained against CD3, CD56, and intracellular IFN- $\gamma$ . Representative dot plots of intracellular IFN- $\gamma$  expression in gated **(A)** CD3<sup>+</sup>CD56<sup>+</sup> natural killer T (NKT) cells and **(B)** CD3<sup>+</sup>CD56<sup>-</sup> T cells. Numbers indicate the percentage of IFN- $\gamma$ -positive (IFN- $\gamma$ <sup>+</sup>) cells. Cumulative data on the percentage of IFN- $\gamma$ -positive **(C)** NKT cells and **(D)** T cells upon exposure to *S. aureus*. Results are expressed as box plots showing the median, interquartile range, and range. Statistical differences were tested using the Wilcoxon signed rank test. iso, isotype control antibodies
