# Supplementary material for: Invasive Surgery Impairs the Regulatory Function of Human CD56bright Natural Killer Cells in Response to Staphylococcus aureus. Suppression of Interferon-γ Synthesis
Source: PubMed Central journal article supplement (PMC4474941; doi:10.1371/journal.pone.0130155), 2015-06-19
Supplement: pone.0130155.s002.pdf [file pone.0130155.s002.pdf]

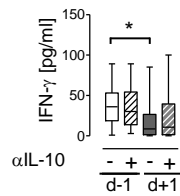

**S2 Figure. Neutralization of IL-10 during stimulation with *S. aureus*.** Peripheral blood from “patients 1” (n=10) was drawn 24 h (d-1) before and 1 d after injury (d+1). PBMC were stimulated with *S. aureus* in the presence or absence of 10  $\mu\text{g/ml}$  neutralizing monoclonal antibodies against IL-10 ( $\alpha\text{IL-10}$ ). The release of IFN- $\gamma$  into the supernatant was determined by ELISA. Statistical differences were tested using the Friedman test followed by Dunn’s multiple comparison test. \*,  $p < 0.05$
