# Supplementary material for: Invasive Surgery Impairs the Regulatory Function of Human CD56bright Natural Killer Cells in Response to Staphylococcus aureus. Suppression of Interferon-γ Synthesis
Source: PubMed Central journal article supplement (PMC4474941; doi:10.1371/journal.pone.0130155), 2015-06-19
Supplement: pone.0130155.s003.pdf [file pone.0130155.s003.pdf]

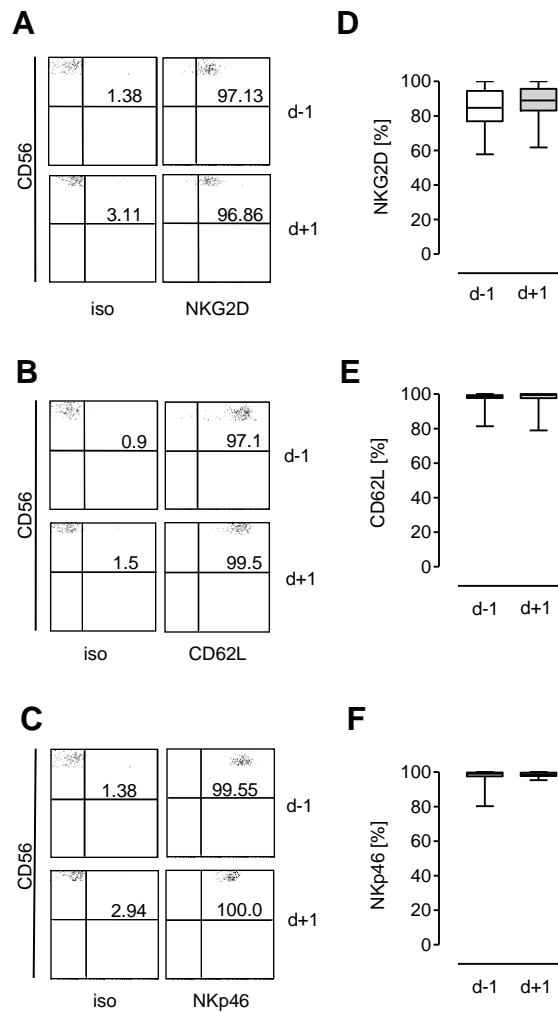

**S3 Figure. Expression of NKG2D, CD62L, and NKp46 on CD56<sup>hi</sup> NK cells after invasive surgery.** Peripheral blood from “patients 2” (n=18) was drawn 24 h before (d-1) and 1 d after injury (d+1). PBMC were stained with fluorochrome-conjugated Abs against CD3, CD56, and NKG2D, CD62L, NKp46, or the corresponding isotype control Abs (iso). Representative dot plots of NKG2D (**A**), CD62L (**B**), NKp46 (**C**) on gated CD3-CD56<sup>hi</sup> NK cells. Numbers indicate the percentage of positive cells. Cumulative data on the expression of NKG2A (**D**), CD62L (**E**), and NKp46 (**F**) on CD56<sup>hi</sup> NK cells from all patients. Data are expressed as box plots showing the median, interquartile range, and range. Statistical differences were tested using the Wilcoxon signed rank test.
